# Supplementary material
Source: PubMed Central journal article supplement (PMC6553888)
Supplement: tpmd180895.SD1.pdf [file tpmd180895.SD1.pdf]

The following are supplemental materials and will be published online only

**Supplementary Table 1. Literature search strategy**

| Database         | Search strategy                                                                                                                                                                                                                                                                                                                                                                                                      |
|------------------|----------------------------------------------------------------------------------------------------------------------------------------------------------------------------------------------------------------------------------------------------------------------------------------------------------------------------------------------------------------------------------------------------------------------|
| MEDLINE          | ("Strongyloidiasis"[Mesh] OR "Strongyloides"[Mesh] OR "Strongyloides stercoralis"[Mesh] OR strongyloid* [All Fields]) OR ("soil transmitted helminths" [All Fields]) OR ("anguillulose" [All Fields]) OR ("anguillulosis" [All Fields]) OR (anguillulos* [All Fields])                                                                                                                                               |
| EMBASE           | #1 'strongyloidiasis'/exp<br>#2 'strongyloides'/exp<br>#3 'strongyloides stercoralis'/exp<br>#4 strongyloidiasis OR strongyloides OR 'strongyloides stercoralis' OR 'soil transmitted helminths' OR anguillulose OR anguillulosis OR anguillulos:ti,ab<br>#5 #1 OR #2 OR #3 OR #4                                                                                                                                    |
| Cochrane CENTRAL | #1 MeSH descriptor: [Strongyloidiasis] explode all trees<br>#2 MeSH descriptor: [Strongyloides] explode all trees<br>#3 MeSH descriptor: [Strongyloides stercoralis] explode all trees<br>#4 Strongyloidiasis or Strongyloides or Strongyloides stercoralis or "soil transmitted helminths" or anguillulose or anguillulosis or anguillulos:ti,ab,kw (Word variations have been searched)<br>#5 #1 or #2 or #3 or #4 |
| LILACS           | <i>Español:</i><br>Strongyloidosis OR estrogiloidiosis OR estrogiloidiasis OR nematodo OR strongyloides stercoralis<br><i>English:</i><br>Strongyloidiasis OR Strongyloides OR Strongyloides stercoralis OR "soil transmitted helminths" OR anguillulose OR anguillulosis OR anguillulos*                                                                                                                            |
